# Supplementary material
Source: Springer Nature journal article supplement (https://www.springermedizin.de/resource/supplementary/13045_2010_99_MOESM1_ESM.pdf/9660650)

**A****myeloid cell lineage**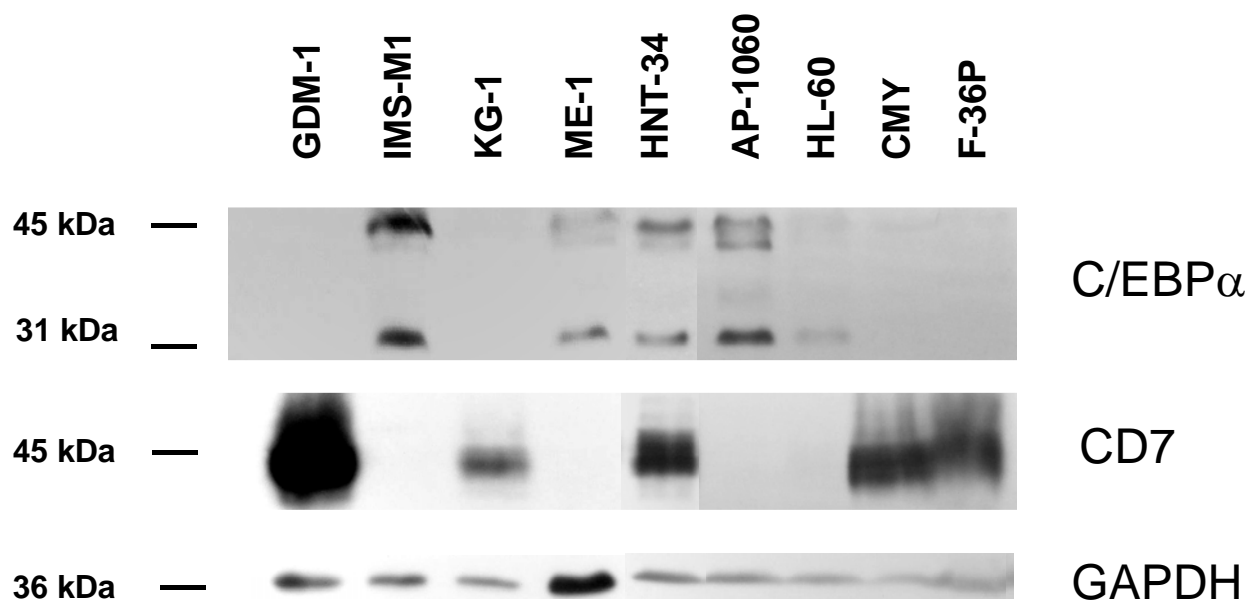**B****T-cell lineage**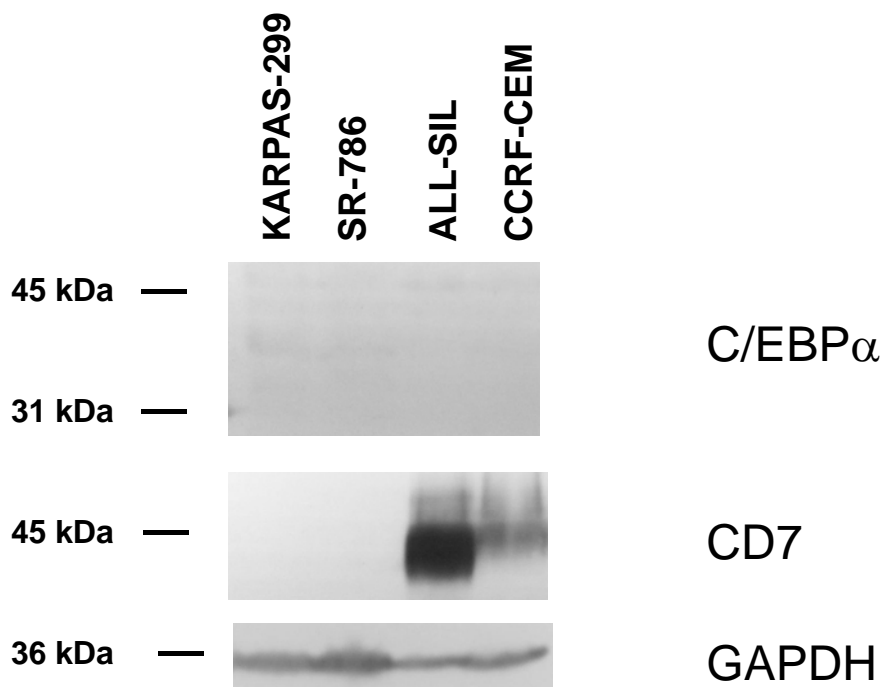

Supplement: MOESM1 [file 9660650]
